# Supplementary material for: High supercapacitor and adsorption behaviors of flower-like MoS2nanostructures
Source: Royal Society of Chemistry journal article supplement (doi:10.1039/c4ta03044c), 2014-01-01
Supplement: c4ta03044c1.pdf [file c4ta03044c1.pdf]

### Figure Supporting

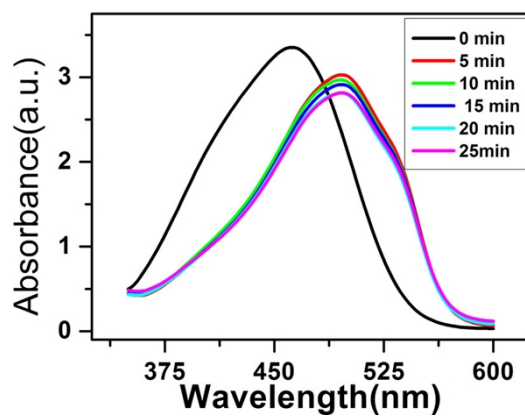

**Fig. S1** UV-visible absorption spectra of 20 mg L<sup>-1</sup> MO solution at different absorption times with 0.02 g as-prepared MoS<sub>2</sub>.
